# Supplementary material for: High-performance NO2-gas sensing of ultrasmall ZnFe2O4 nanoparticles based on surface charge transfer
Source: Royal Society of Chemistry journal article supplement (doi:10.1039/c8ta12168k), 2019-01-01
Supplement: c8ta12168k1.pdf [file c8ta12168k1.pdf]

## High-Performance NO<sub>2</sub> Gas Sensing of Ultra-Small ZnFe<sub>2</sub>O<sub>4</sub> nanoparticles

### Based on Surface Charge Transfer

Ke Li<sup>a, b</sup>, Yuanyuan Luo<sup>a,\*</sup>, Bo Liu<sup>a, b</sup>, Lei Gao<sup>a</sup>, and Guotao Duan<sup>c,\*</sup>

<sup>a</sup>Key Lab of Materials Physics, Anhui Key Lab of Nanomaterials and Nanotechnology,  
Institute of Solid State Physics, Chinese Academy of Sciences, Hefei 230031, P.R.  
China

<sup>b</sup> University of Science and Technology of China, Hefei, 230026, P.R. China

<sup>c</sup> School of Optical and Electronic Information, Huazhong University of Science and  
Technology, 1037 Luoyu Road, Wuhan, Hubei 430074, P.R. China

\*Email: yyluo@issp.ac.cn, duangt@hust.edu.cn

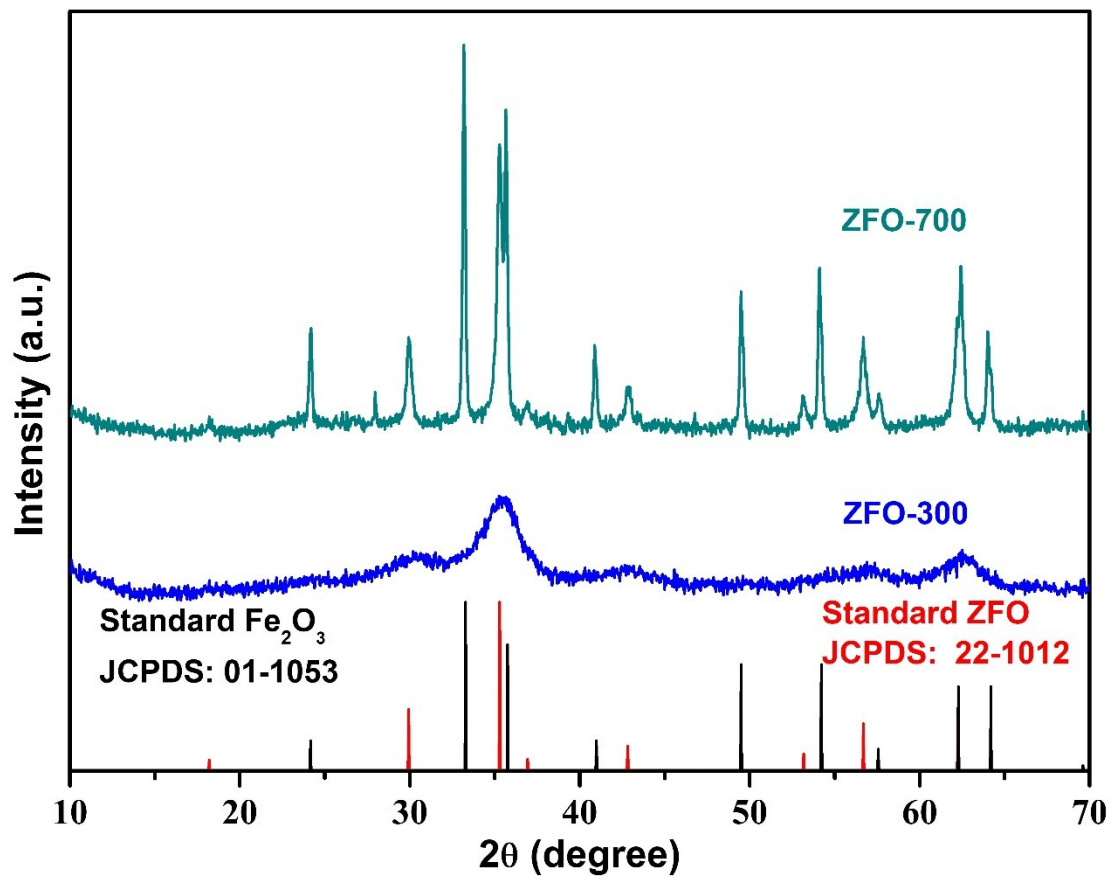

**Figure S1.** The X-ray diffraction patterns of ZFO nanoparticles acquired after calcining ZnFe-nitrate precursor at 700 °C (Green line) and 300 °C (Blue line) for 2 h, respectively.

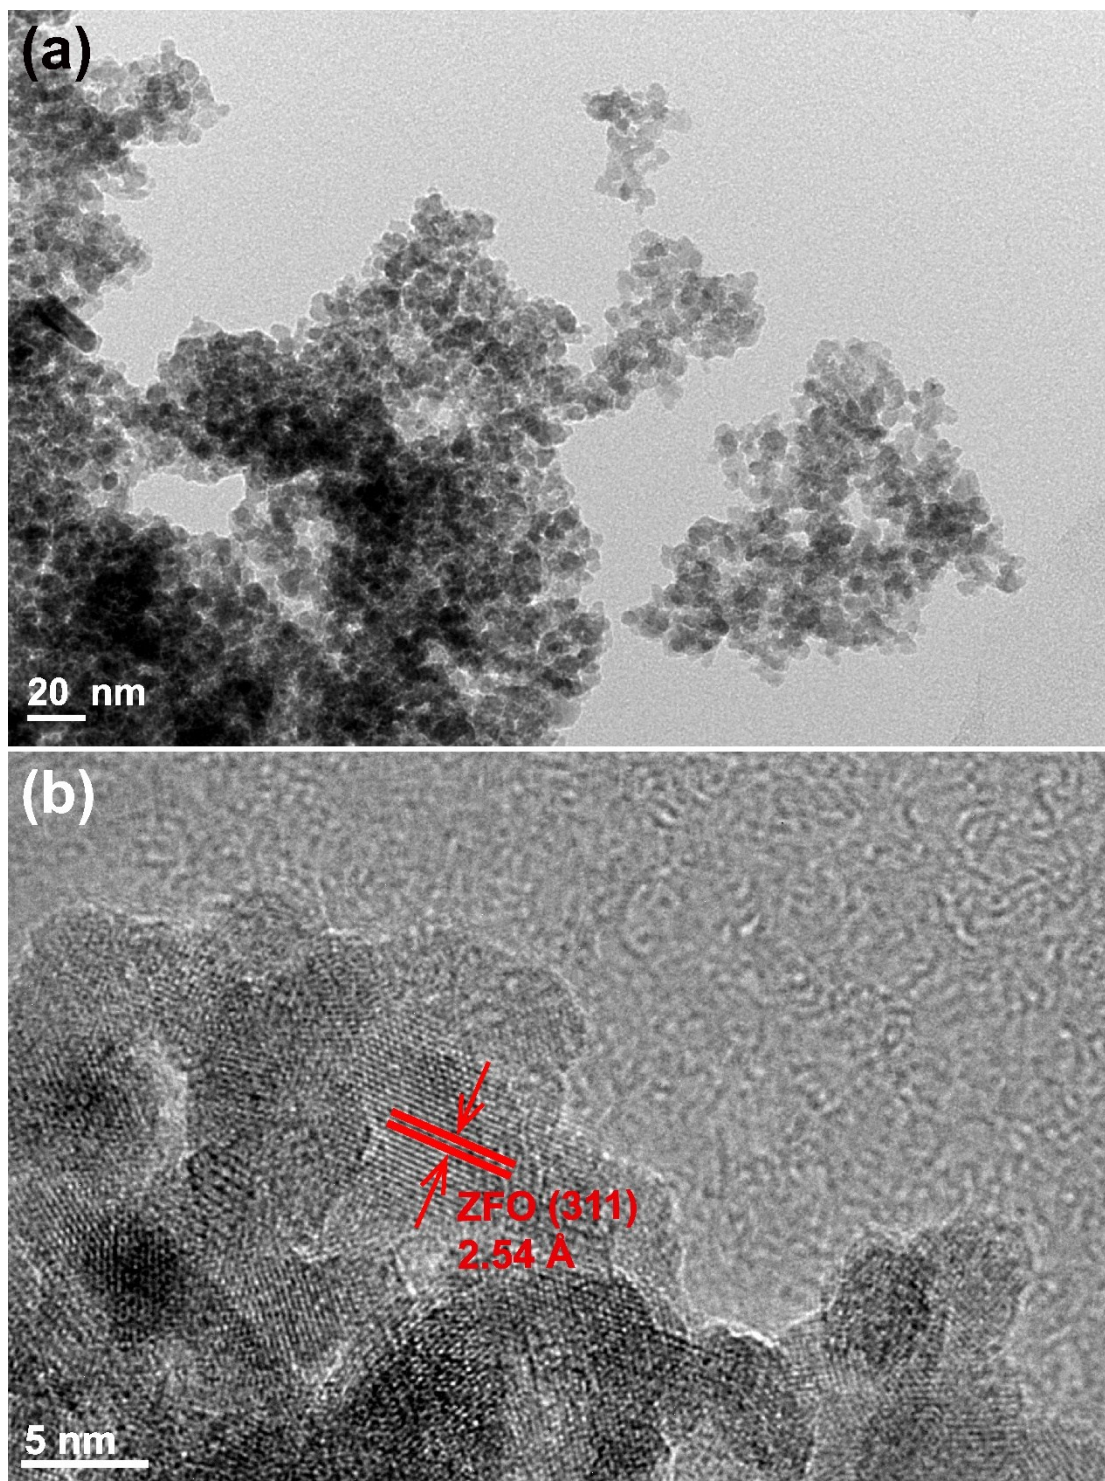

**Figure S2.** (a) TEM image of the ZFO-300 nanoparticles. (b) HRTEM of ZFO-700 nanoparticles.

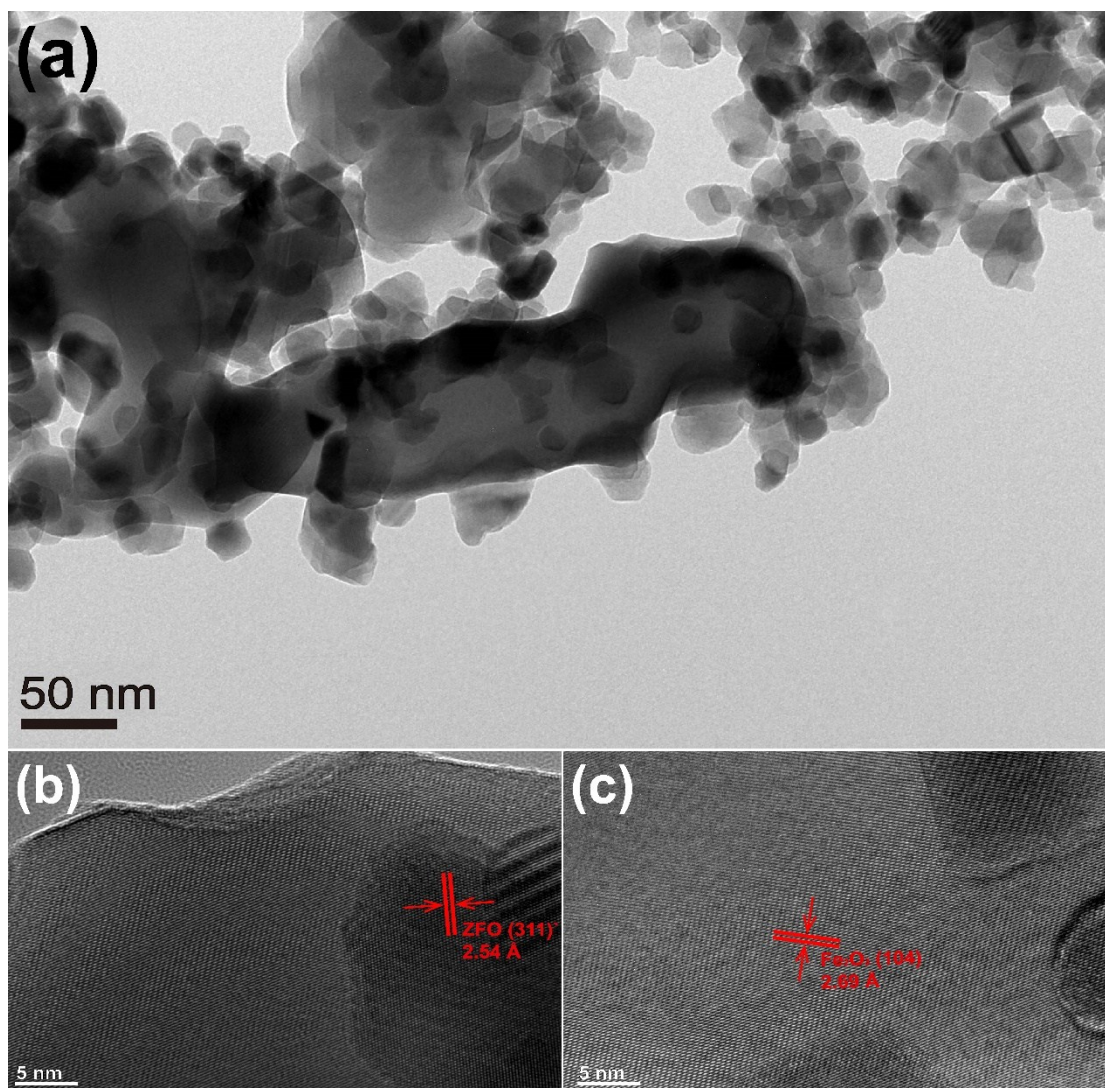

**Figure S3.** (a) TEM image of the ZFO-700 nanoparticles. (b~c) HRTEM of ZFO-700 nanoparticles.

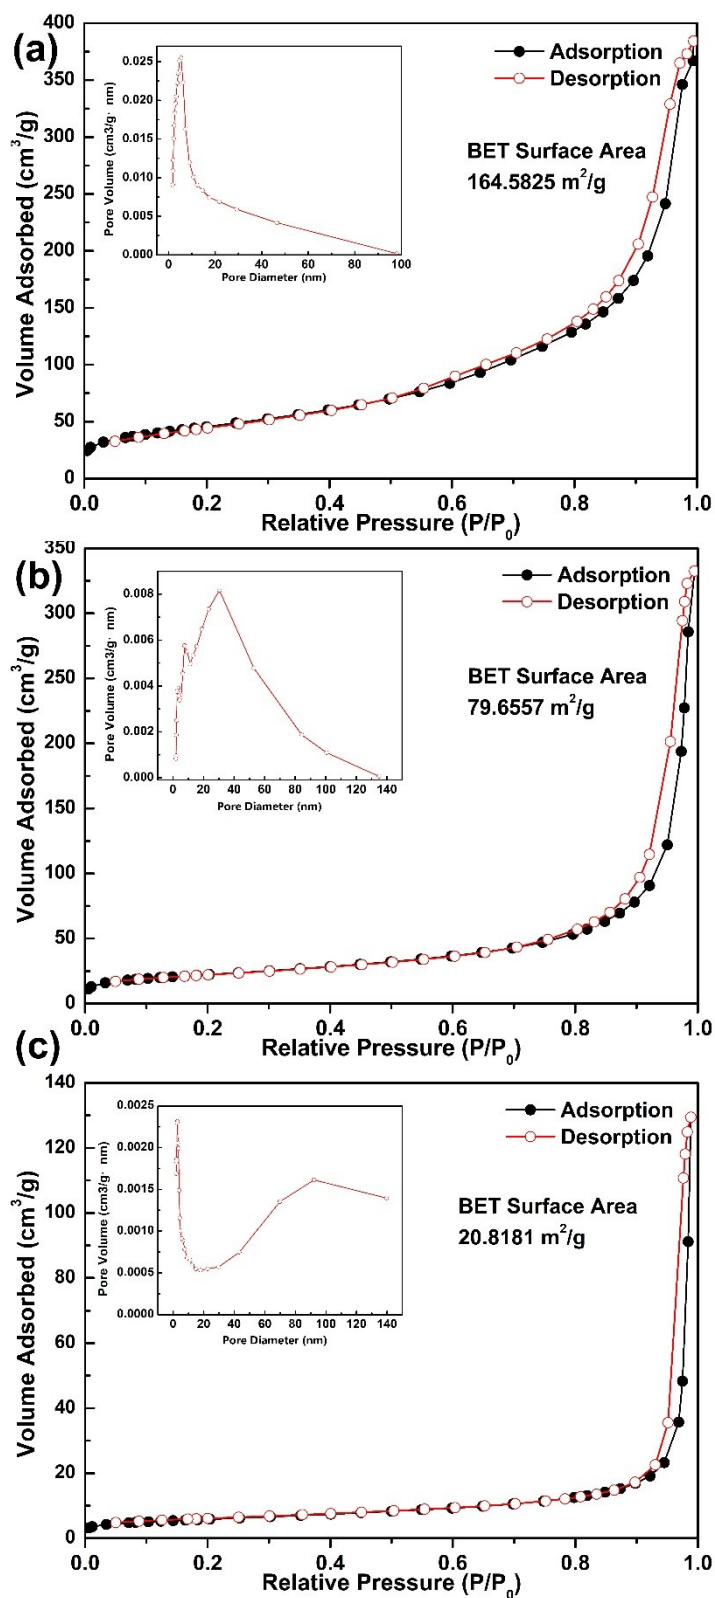

**Figure S4.**  $N_2$  adsorption-desorption isotherms and the pore size distributions(inset) of ZFO nanoparticles obtained after calcination at 300(a), 500(b) and 700(c) °C, respectively.

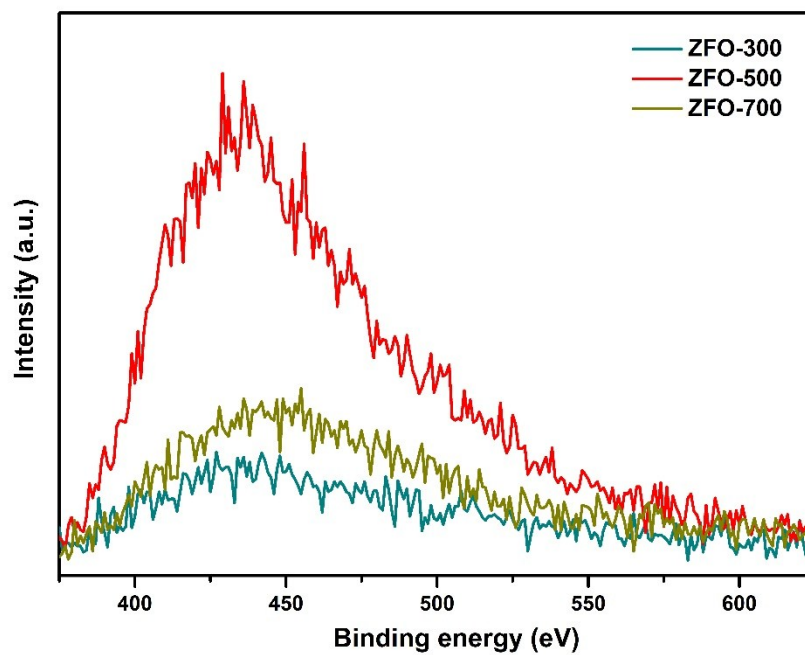

**Figure S5.** Photoluminescence spectrum of ZFO-300, ZFO-500 and ZFO-700 obtained after using a 400 nm optical filter at xenon lamp with excitation wavelength of 350 nm.

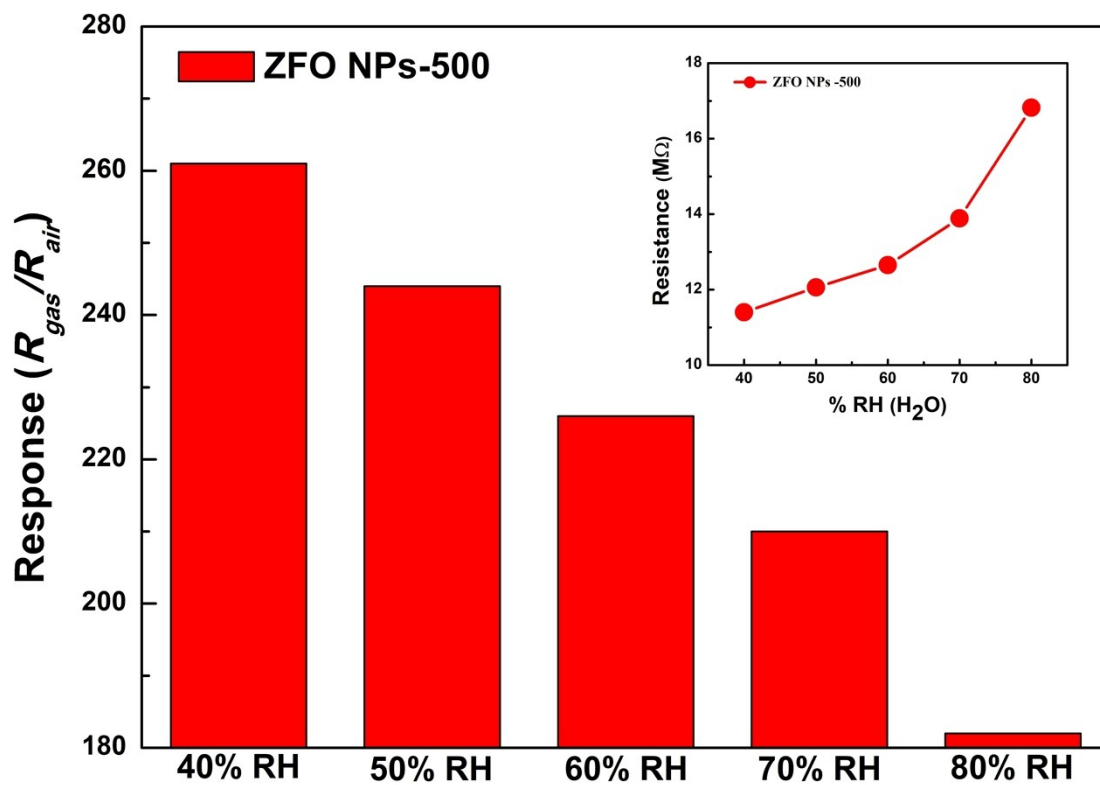

**Figure S6.** The gas response and initial resistance (inset) of ZFO NPs based sensor upon exposure into 10 ppm NO<sub>2</sub> under different humidity at the temperature of 125°C.

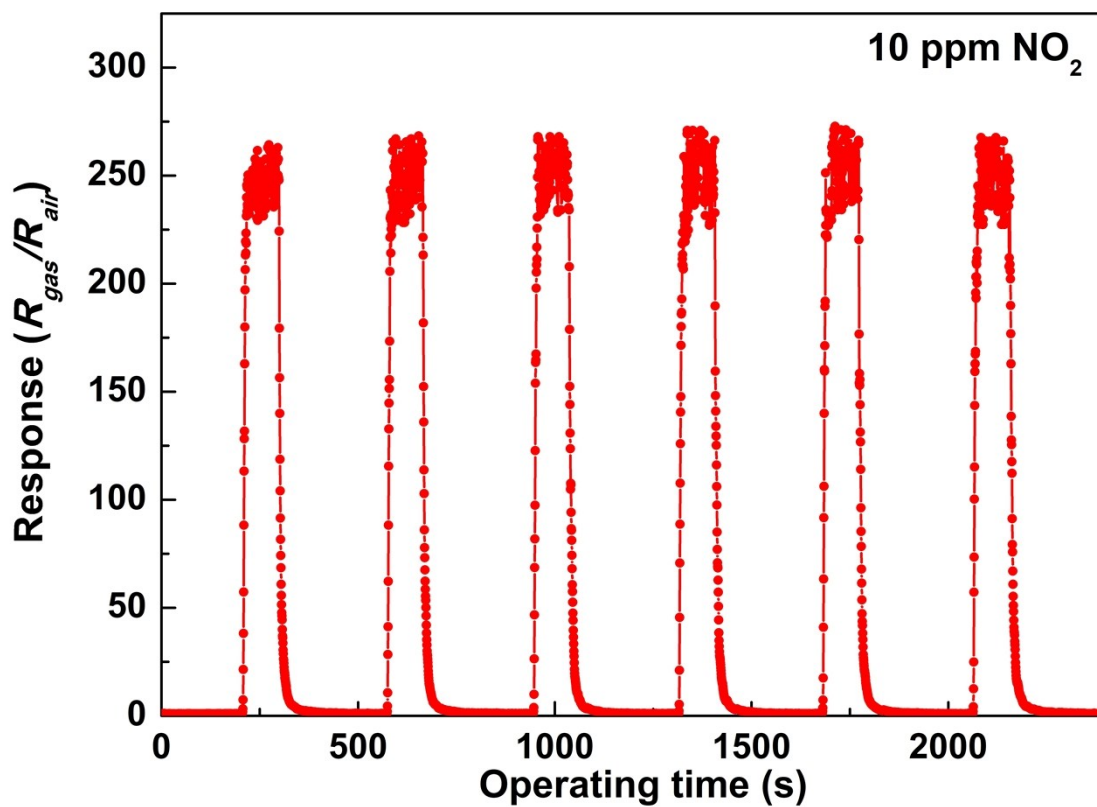

**Figure S7.** The cycling stability of ZFO NPs based sensor, which placed three months, upon exposure into 10 ppm NO<sub>2</sub> at the temperature of 125°C.



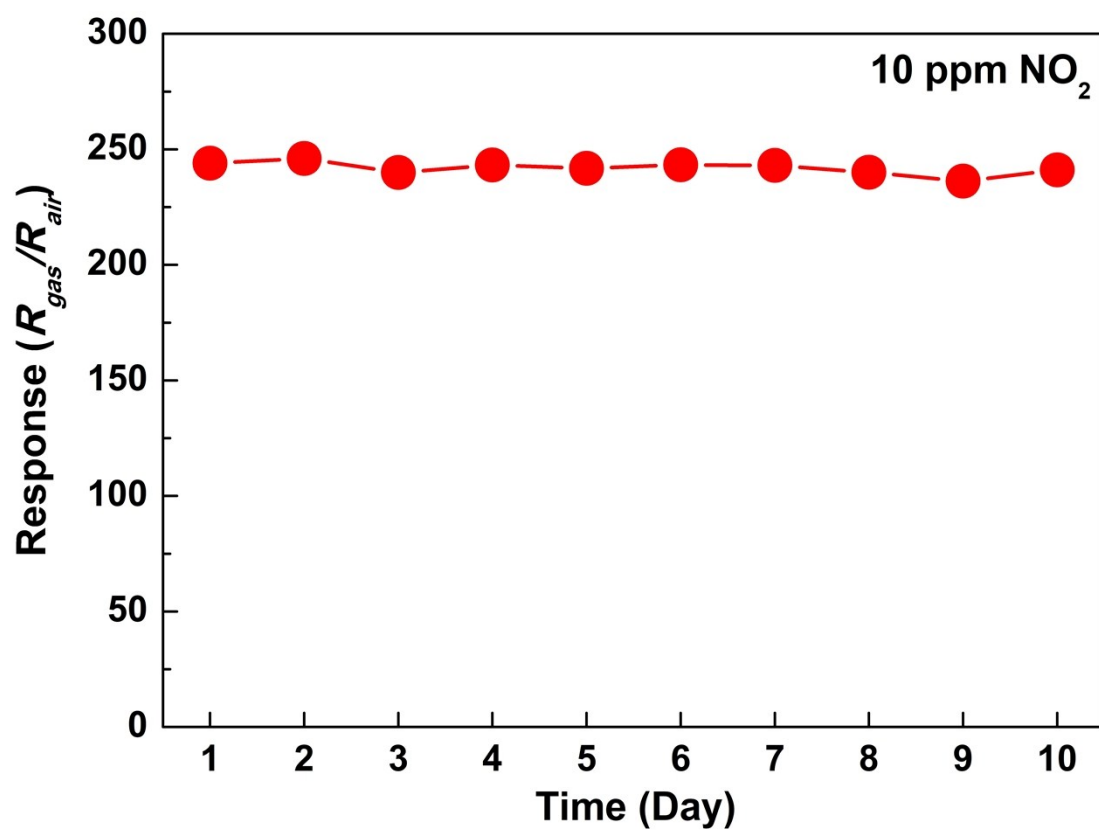

**Figure S8.** The long-term stability of ZFO NPs based sensor, which placed three months, upon exposure into 10 ppm NO<sub>2</sub> at the temperature of 125°C.

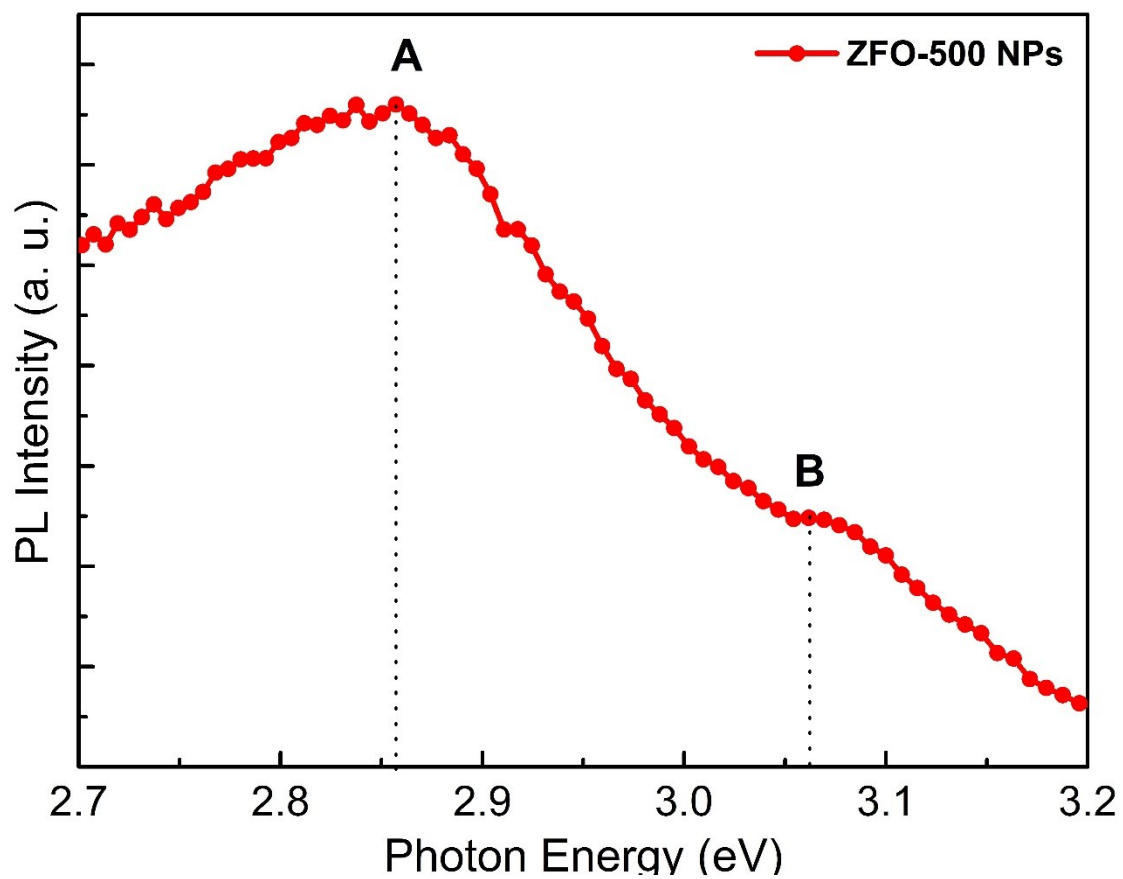

**Figure S9.** PL spectra of ZFO-500 NPs (flowed by pure N<sub>2</sub> at the temperature of 125 °C for 2 hours) upon exposure to pure N<sub>2</sub> along.

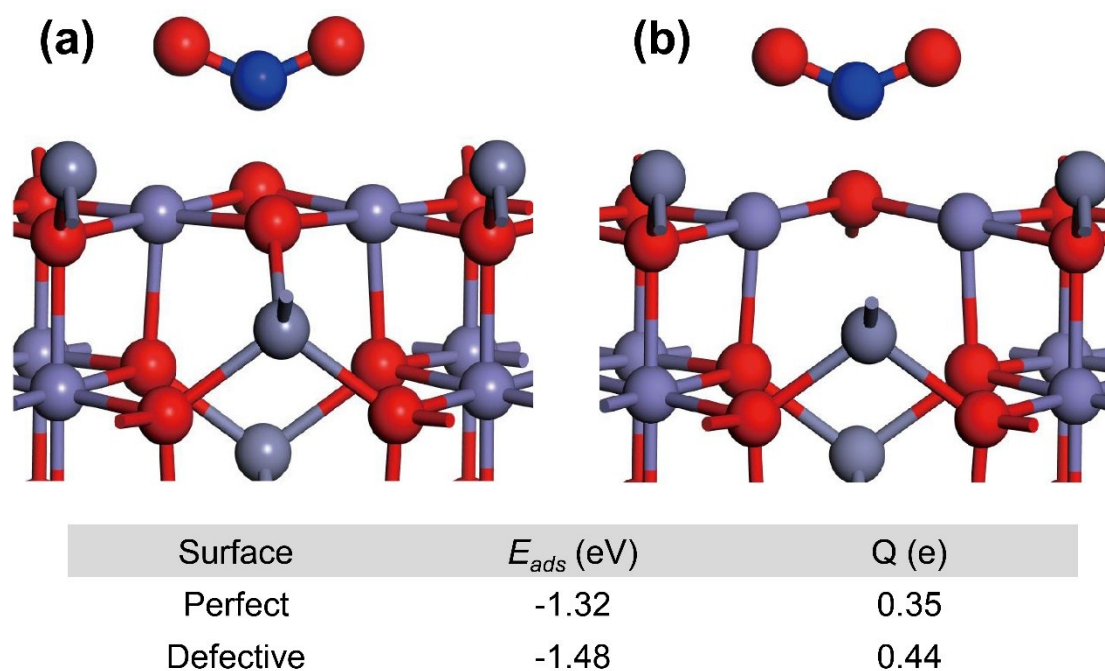

**Figure S10.** Optimized adsorption geometries for: (a) NO<sub>2</sub> molecule on a perfect ZFO (100) surface, (b) NO<sub>2</sub> molecule on a defective ZFO (100) surface with oxygen vacancy. The adsorption energy ( $E_{ads}$ ) and net charge (Q) for NO<sub>2</sub> molecule on perfect and defective ZFO (100) surface. The red, blue, grey and purple balls indicate oxygen, nitrogen, iron and zinc atoms, respectively.

**Table S1.** The gas-sensing performances (Response  $R_{gas}/R_{air}$ , Response time and Recovery time) of ZFO-500 under different NO<sub>2</sub> concentrations at the operating temperature of 125 °C.

| NO <sub>2</sub> concentration<br>(ppm) | Response ( $R_{gas}/R_{air}$ ) | Response time<br>(s) | Recovery time<br>(s) |
|----------------------------------------|--------------------------------|----------------------|----------------------|
| 1                                      | 5.5                            | 42                   | 15                   |
| 1.5                                    | 31                             | 41                   | 15                   |
| 2                                      | 60                             | 36                   | 14                   |
| 2.5                                    | 68                             | 25                   | 13                   |
| 5                                      | 113                            | 15                   | 14                   |
| 7.5                                    | 212                            | 10                   | 12                   |
| 10                                     | 247.7                          | 6.5                  | 11                   |
